# Supplementary material
Source: PubMed Central journal article supplement (PMC373482)

**A**

10 somite stage

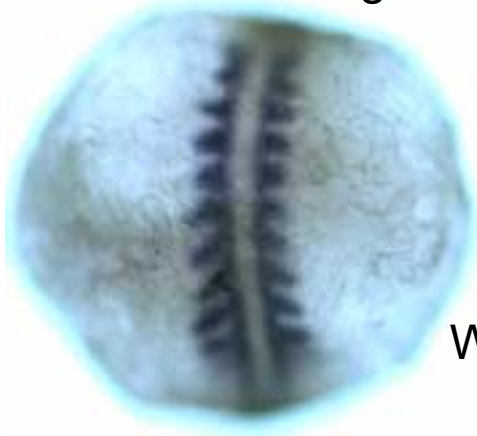**B**

24 h

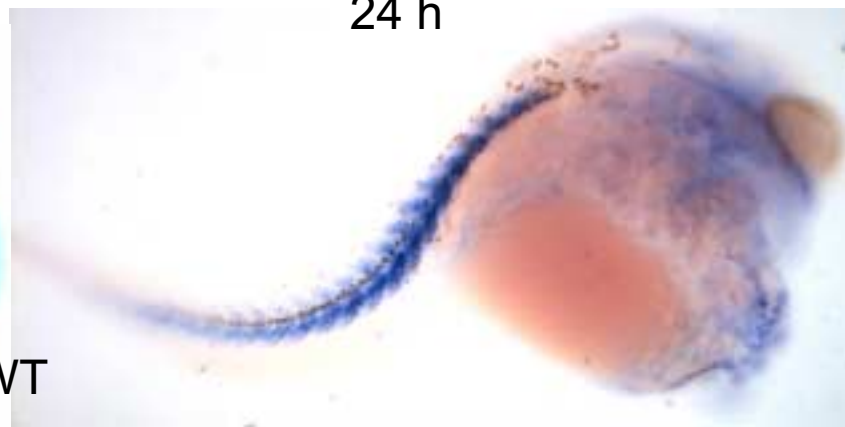**C**

10 somite stage

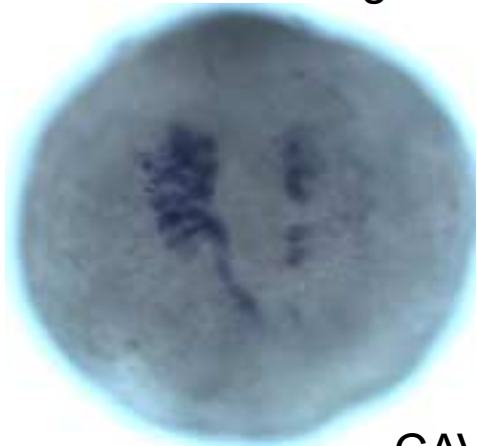**D**

24 h

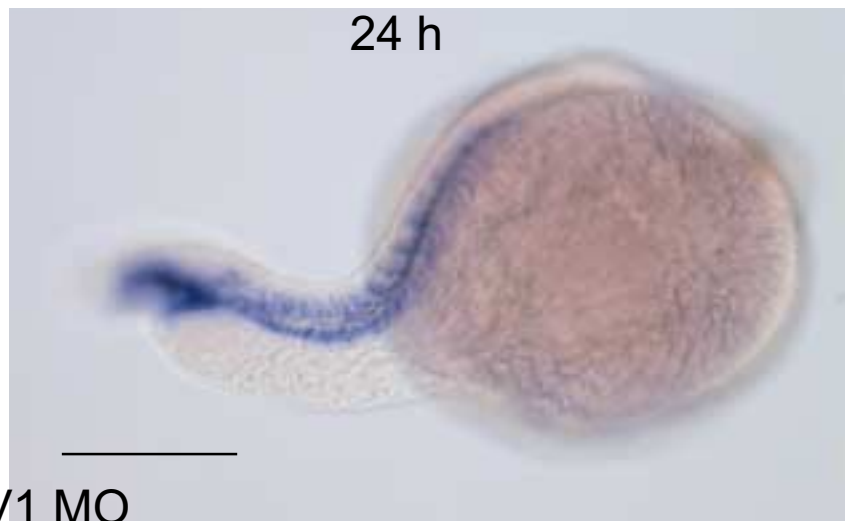

Supplement: pnas_0400441101_5.pdf [file pnas_0400441101_5.pdf]
